# Supplementary material for: Association Between Maternal Exposure to Magnetic Field Nonionizing Radiation During Pregnancy and Risk of Attention-Deficit/Hyperactivity Disorder in Offspring in a Longitudinal Birth Cohort
Source: PubMed Central journal article supplement (PMC7093768; doi:10.1001/jamanetworkopen.2020.1417), 2020-03-24
Supplement: jamanetwopen-3-e201417-s001.pdf [file jamanetwopen-3-e201417-s001.pdf]

## Supplementary Online Content

Li D-K, Chen H, Ferber JR, Hirst AK, Odouli R. Association between maternal exposure to magnetic field nonionizing radiation during pregnancy and risk of attention-deficit/hyperactivity disorder in offspring in a longitudinal birth cohort. *JAMA Netw Open*. 2020;3(3):e201417. doi:10.1001/jamanetworkopen.2020.1417

**eFigure.** Flow Chart for the Study Population

**eTable.** Maternal Exposure to MF Nonionizing Radiation During Pregnancy and Risk of ADHD Stratified by the Presence or Absence of Immune-Related Comorbidity

This supplementary material has been provided by the authors to give readers additional information about their work.

**eFigure.** Flow Chart for the Study Population

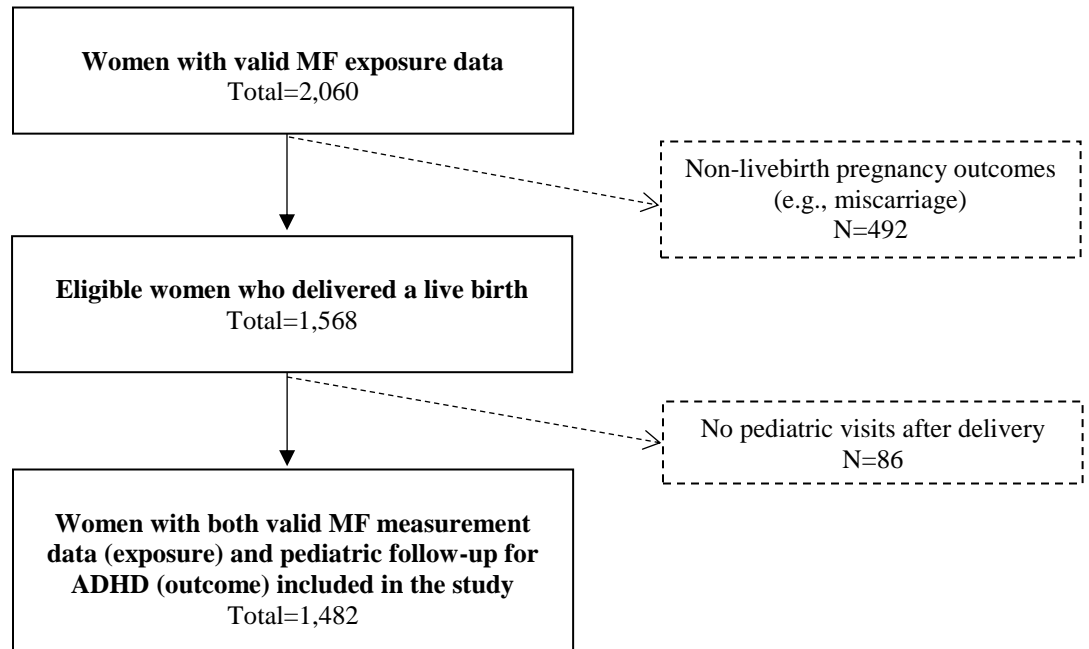

**eTable.** Maternal Exposure to MF Nonionizing Radiation During Pregnancy and Risk of ADHD  
Stratified by the Presence or Absence of Immune-Related Comorbidity<sup>a</sup>

| <b>MF at 90<sup>th</sup> Percentile</b>       | <b>Yes (%)</b> | <b>No (%)</b> | <b>aHR<sup>c</sup> (95% CI)<sup>d, f</sup></b> |
|-----------------------------------------------|----------------|---------------|------------------------------------------------|
| <b>All ADHD<sup>b</sup></b>                   |                |               |                                                |
| <b>Presence of Immune-related comorbidity</b> |                |               |                                                |
| Low <sup>e</sup> (N=252)                      | 4 (1.6%)       | 248 (98.4%)   | 1 [Reference]                                  |
| High <sup>e</sup> (N=425)                     | 35 (8.2%)      | 390 (91.8%)   | <b>4.21 (1.47, 12.03)</b>                      |
| <b>Absence of Immune-related comorbidity</b>  |                |               |                                                |
| Low <sup>e</sup> (N=320)                      | 8 (2.5%)       | 312 (97.5%)   | 1 [Reference]                                  |
| High <sup>e</sup> (N=457)                     | 14 (3.1%)      | 443 (96.9%)   | 1.00 (0.41, 2.45)                              |
| <b>Persistent ADHD<sup>c</sup></b>            |                |               |                                                |
| <b>Presence of Immune-related comorbidity</b> |                |               |                                                |
| Low <sup>e</sup> (N=250)                      | 2 (0.8%)       | 248 (99.2%)   | 1 [Reference]                                  |
| High <sup>e</sup> (N=422)                     | 32 (7.6%)      | 390 (92.4%)   | <b>8.11 (1.91, 34.38)</b>                      |
| <b>Absence of Immune-related comorbidity</b>  |                |               |                                                |
| Low <sup>e</sup> (N=316)                      | 4 (1.3%)       | 312 (98.7%)   | 1 [Reference]                                  |
| High <sup>e</sup> (N=454)                     | 11 (2.4%)      | 443 (97.6%)   | 1.42 (0.44, 4.61)                              |

Abbreviations: ADHD, attention-deficit/hyperactivity disorder; aHR, adjusted hazard ratio; MF, magnetic field.

<sup>a</sup> Asthma or Atopic Dermatitis

<sup>b</sup> Case Definition of ADHD is defined as those who had 2 ADHD diagnoses at least one year apart.

<sup>c</sup> Defined as those who continued to have ADHD diagnoses at age 12 or older.

<sup>d</sup> Adjusted for maternal age, race/ethnicity, educational level, prenatal smoking and alcohol use, pre-pregnancy body mass index and sex of offspring.

<sup>e</sup> Low is defined as <1.3 mG. High is defined as ≥1.3 mG

<sup>f</sup> The p-value for the interactions: 0.04 for all ADHD, and 0.08 for persistent ADHD, respectively.
